# Supplementary material for: Synthesis, structure and catalytic applications of amidoterephthalate copper complexes in the diastereoselective Henry reaction in aqueous medium
Source: Royal Society of Chemistry journal article supplement (doi:10.1039/c4nj00878b), 2014-07-29
Supplement: c4nj00878b1.pdf [file c4nj00878b1.pdf]

## Supporting Information

### Synthesis, Structure and Catalytic Application of Amidoterephthalate Copper Complexes in Diastereoselective Henry Reaction in Aqueous Medium

**Anirban Karmakar\***, **Susanta Hazra**, **M. Fátima C. Guedes da Silva\*** and **Armando J. L. Pombeiro\***

Centro de Química Estrutural, Instituto Superior Técnico, Universidade de Lisboa, Av. Rovisco Pais, 1049-001, Lisbon, Portugal. E-mail: [anirbanchem@gmail.com](mailto:anirbanchem@gmail.com); [fatima.guedes@tecnico.ulisboa.pt](mailto:fatima.guedes@tecnico.ulisboa.pt); [pombeiro@tecnico.ulisboa.pt](mailto:pombeiro@tecnico.ulisboa.pt)

| <b>Table S1: Crystal data and structure refinement details for H<sub>2</sub>L1, H<sub>2</sub>L2, complex 1 and complex 2</b> |                                                                       |                                                                       |                                                                       |                                                                       |
|------------------------------------------------------------------------------------------------------------------------------|-----------------------------------------------------------------------|-----------------------------------------------------------------------|-----------------------------------------------------------------------|-----------------------------------------------------------------------|
| Identification name                                                                                                          | <b>H<sub>2</sub>L1</b>                                                | <b>H<sub>2</sub>L2</b>                                                | <b>Complex 1</b>                                                      | <b>Complex 2</b>                                                      |
| Formulae                                                                                                                     | C <sub>17</sub> H <sub>25</sub> N <sub>3</sub> O <sub>7</sub>         | C <sub>11</sub> H <sub>13</sub> NO <sub>6</sub>                       | C <sub>11</sub> H <sub>17</sub> CuNO <sub>9</sub>                     | C <sub>10</sub> H <sub>15</sub> CuNO <sub>9</sub>                     |
| Mol. wt.                                                                                                                     | 383.40                                                                | 255.22                                                                | 370.79                                                                | 356.77                                                                |
| Crystal system                                                                                                               | Triclinic                                                             | Monoclinic                                                            | Triclinic                                                             | Triclinic                                                             |
| Space group                                                                                                                  | P-1                                                                   | P2(1)/c                                                               | P-1                                                                   | P-1                                                                   |
| Temperature /K                                                                                                               | 296                                                                   | 296                                                                   | 150                                                                   | 296                                                                   |
| Wavelength /Å                                                                                                                | 0.71073                                                               | 0.71073                                                               | 0.71073                                                               | 0.71073                                                               |
| <i>a</i> /Å                                                                                                                  | 7.8968(15)                                                            | 8.2402(4)                                                             | 7.4875(3)                                                             | 7.5580(10)                                                            |
| <i>b</i> /Å                                                                                                                  | 8.8683(18)                                                            | 15.2755(8)                                                            | 9.4303(3)                                                             | 9.2626(13)                                                            |
| <i>c</i> /Å                                                                                                                  | 16.015(3)                                                             | 9.6698(5)                                                             | 10.4406(4)                                                            | 10.5360(14)                                                           |
| $\alpha$ /°                                                                                                                  | 99.775(7)                                                             | 90.00                                                                 | 78.225(2)                                                             | 104.104(4)                                                            |
| $\beta$ /°                                                                                                                   | 98.719(7)                                                             | 98.276(2)                                                             | 84.542(2)                                                             | 90.218(4)                                                             |
| $\gamma$ /°                                                                                                                  | 111.790(7)                                                            | 90.00                                                                 | 83.261(2)                                                             | 96.517(5)                                                             |
| <i>V</i> / Å <sup>3</sup>                                                                                                    | 997.7(3)                                                              | 1204.49(11)                                                           | 714.78(5)                                                             | 710.35(17)                                                            |
| <i>Z</i>                                                                                                                     | 2                                                                     | 4                                                                     | 2                                                                     | 2                                                                     |
| Density/Mgm <sup>-3</sup>                                                                                                    | 1.276                                                                 | 1.407                                                                 | 1.723                                                                 | 1.668                                                                 |
| Abs. Coeff. /mm <sup>-1</sup>                                                                                                | 0.100                                                                 | 0.116                                                                 | 1.575                                                                 | 1.581                                                                 |
| <i>F</i> (000)                                                                                                               | 408                                                                   | 536                                                                   | 382                                                                   | 366                                                                   |
| Refl. collected                                                                                                              | 14662                                                                 | 21464                                                                 | 5462                                                                  | 17154                                                                 |
| Refl. unique                                                                                                                 | 3652                                                                  | 2214                                                                  | 2594                                                                  | 2607                                                                  |
| Max. 2 $\theta$ /°                                                                                                           | 25.35                                                                 | 25.37                                                                 | 25.38                                                                 | 25.53                                                                 |
| Ranges ( <i>h</i> , <i>k</i> , <i>l</i> )                                                                                    | -9 <= <i>h</i> <= 9<br>-10 <= <i>k</i> <= 10<br>-19 <= <i>l</i> <= 19 | -9 <= <i>h</i> <= 9<br>-18 <= <i>k</i> <= 18<br>-11 <= <i>l</i> <= 11 | -7 <= <i>h</i> <= 9<br>-11 <= <i>k</i> <= 11<br>-12 <= <i>l</i> <= 12 | -9 <= <i>h</i> <= 9<br>-11 <= <i>k</i> <= 11<br>-12 <= <i>l</i> <= 12 |
| Complete to 2 $\theta$ (%)                                                                                                   | 99.9                                                                  | 100                                                                   | 98.3                                                                  | 97.9                                                                  |
| Refl. with <i>l</i> > 2 $\sigma$ ( <i>l</i> )                                                                                | 1863                                                                  | 1542                                                                  | 2181                                                                  | 2451                                                                  |
| Data/<br>Restraints/Parameters                                                                                               | 3652/0/250                                                            | 2214/0/ 168                                                           | 2594/ 8 / 224                                                         | 2607 /8 / 213                                                         |

|                     |        |        |        |        |
|---------------------|--------|--------|--------|--------|
| Goof ( $F^2$ )      | 1.011  | 1.017  | 1.059  | 1.126  |
| R1 [ $I > 2s(I)$ ]  | 0.0832 | 0.0497 | 0.0439 | 0.0386 |
| wR2 [ $I > 2s(I)$ ] | 0.2266 | 0.1254 | 0.1047 | 0.1043 |
| R1 [all data]       | 0.1473 | 0.0778 | 0.0553 | 0.0415 |
| wR2 [all data]      | 0.2831 | 0.1419 | 0.1114 | 0.1095 |

**Table S2: Hydrogen bond geometry ( $\text{\AA}$ ,  $^\circ$ ) in compounds  $\text{H}_2\text{L1}$ ,  $\text{H}_2\text{L2}$ , complex 1 and complex 2**

| Compound                                | D-H...A        | D...H ( $\text{\AA}$ ) | H...A ( $\text{\AA}$ ) | D...A ( $\text{\AA}$ ) | $\angle\text{D-H...A}$ ( $^\circ$ ) |
|-----------------------------------------|----------------|------------------------|------------------------|------------------------|-------------------------------------|
| <b><math>\text{H}_2\text{L1}</math></b> | N1-H1...O4     | 0.86                   | 1.98                   | 2.680(4)               | 138                                 |
|                                         | O2-H2o...O6    | 0.82                   | 1.77                   | 2.584(4)               | 173                                 |
|                                         | O3-H3o...O7    | 0.82                   | 1.75                   | 2.560(3)               | 169                                 |
|                                         | C3-H3...O7     | 0.93                   | 2.60                   | 3.366(5)               | 141                                 |
|                                         | C8-H8...O5     | 0.93                   | 2.19                   | 2.824(5)               | 124                                 |
|                                         | C14-H14...O1   | 0.93                   | 2.54                   | 3.215(5)               | 130                                 |
| <b><math>\text{H}_2\text{L2}</math></b> | N1-H1...O1     | 0.86                   | 1.93                   | 2.656(2)               | 141                                 |
|                                         | O2-H2o...O6    | 0.82                   | 1.74                   | 2.554(3)               | 170                                 |
|                                         | O4-H4o...O5    | 0.82                   | 1.86                   | 2.632(2)               | 157                                 |
|                                         | O6-H6...O3     | 0.82                   | 1.91                   | 2.731(3)               | 175                                 |
|                                         | C10-H10A...O3  | 0.96                   | 2.61                   | 3.501(3)               | 153.6                               |
| <b>Complex 1</b>                        | N1-H1...O1     | 0.86                   | 1.96                   | 2.673(4)               | 139                                 |
|                                         | O12-H12A...O5  | 0.931(19)              | 2.08(2)                | 2.982(4)               | 164(4)                              |
|                                         | O12-H12B...O2  | 0.945(19)              | 2.01(2)                | 2.953(4)               | 174(4)                              |
|                                         | O13-H13A...O3  | 0.865(19)              | 2.05(2)                | 2.918(4)               | 177(4)                              |
|                                         | O13-H13B...O4  | 0.867(19)              | 1.92(2)                | 2.773(4)               | 166(4)                              |
|                                         | O14-H14A...O4  | 0.955(19)              | 2.08(2)                | 3.021(5)               | 166(4)                              |
|                                         | O14-H14B...O3  | 0.936(19)              | 2.10(2)                | 3.027(4)               | 171(4)                              |
|                                         | O15-H15A...O13 | 0.948(19)              | 2.48(2)                | 3.406(5)               | 166(4)                              |
| O15-H15B...O3                           | 0.947(19)      | 2.43(2)                | 3.363(5)               | 169(4)                 |                                     |
| <b>Complex 2</b>                        | N1-H1...O1     | 0.86                   | 1.91                   | 2.634(3)               | 140                                 |
|                                         | O11-H11A...O2  | 0.944(19)              | 2.04(2)                | 2.954(3)               | 163(3)                              |
|                                         | O11-H11B...O3  | 0.922(19)              | 2.01(2)                | 2.919(4)               | 169(3)                              |
|                                         | O12-H12A...O13 | 0.82                   | 2.48                   | 3.275(4)               | 163                                 |
|                                         | O13-H13B...O4  | 0.883(19)              | 1.948(19)              | 2.829(3)               | 175(4)                              |
|                                         | O13-H13A...O3  | 0.884(19)              | 1.93(2)                | 2.800(3)               | 168(3)                              |
|                                         | O14-H14A...O4  | 0.909(19)              | 2.10(2)                | 2.989(3)               | 166(3)                              |
| O14-H14B...O3                           | 0.957(19)      | 2.15(2)                | 3.047(4)               | 156(3)                 |                                     |

**Table S3: Selected bond distances ( $\text{\AA}$ ) and angles ( $^\circ$ ) for complex 1 and complex 2**

|                  |                                                                                                                                                                                                                                            |
|------------------|--------------------------------------------------------------------------------------------------------------------------------------------------------------------------------------------------------------------------------------------|
| <b>Complex 1</b> | Cu1-O1, 2.001(2); Cu1-O12, 1.996(3); Cu1-O13, 2.417(3); Cu1-O14, 2.007(3); Cu1-O15, 2.028(4);<br>$\angle\text{O12-Cu1-O14}$ , 165.46(14); $\angle\text{O12-Cu1-O1}$ , 87.57(12); $\angle\text{O14-Cu1-O1}$ , 91.89(12); $\angle\text{O12-$ |
|------------------|--------------------------------------------------------------------------------------------------------------------------------------------------------------------------------------------------------------------------------------------|

|                  |                                                                                                                                                                                                                                                                                                                                                          |
|------------------|----------------------------------------------------------------------------------------------------------------------------------------------------------------------------------------------------------------------------------------------------------------------------------------------------------------------------------------------------------|
|                  | Cu1-O15, 89.24(14); <O14-Cu1-O15, 91.45(15); <O1-Cu1-O15, 176.66(13); <O12-Cu1-O13, 104.05(12); <O14-Cu1-O13, 90.48(12); <O1-Cu1-O13, 93.65(10); <O15-Cu1-O13, 86.16(13)                                                                                                                                                                                 |
| <b>Complex 2</b> | Cu1-O1, 1.9903(19); Cu1-O11, 1.996(3); Cu1-O12, 2.027(3); Cu1-O13, 2.398(2); Cu1-O14, 2.011(3)<br><O1-Cu1-O11, 87.93(10); <O1-Cu1-O14, 90.25(10); <O11-Cu1-O14, 164.27(12); <O1-Cu1-O12, 176.48(9); <O11-Cu1-O12, 90.37(11); <O14-Cu1-O12, 92.21(12); <O1-Cu1-O13, 87.95(8); <O11-Cu1-O13, 104.06(10); <O14-Cu1-O13, 91.48(10); <O12-Cu1-O13, 89.48(10); |

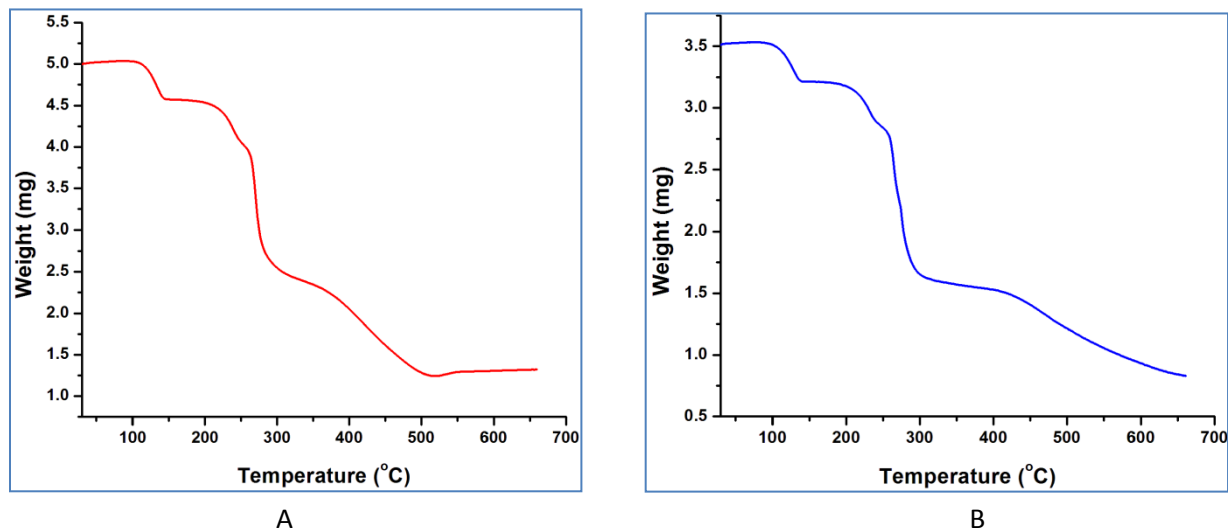

Figure S1: Thermogravimetric curves for complex 1 (A) and complex 2 (B).

**Calculation of the yield and selectivity for compound 1 in the Henry reaction**

Relative amounts of compounds (see Fig. S11):

$$\text{Benzaldehyde} + \text{anti} + \text{syn} = 1 + 0.6 + 2.75 = 4.35$$

Percentage of the unreacted benzaldehyde:

$$1/4.35 \times 100 = 23\%$$

Conversion of benzaldehyde = yield of  $\beta$ -nitroalkanols =  $100 - 23 = 77\%$ .

Yield of *anti*:

$$0.6/4.35 \times 100 = 13.8\%$$

Yield of *syn*:

$$2.75/4.35 \times 100 = 63.2\%$$

**Selectivity:**

$$\text{Sum of anti} + \text{syn} = 13.8 + 63.2 = 77\%$$

Selectivity of *anti*:

$$13.8/77 \times 100 = 18\%$$

Selectivity of *syn*:  
 $63.2/77 \times 100 = 82\%$

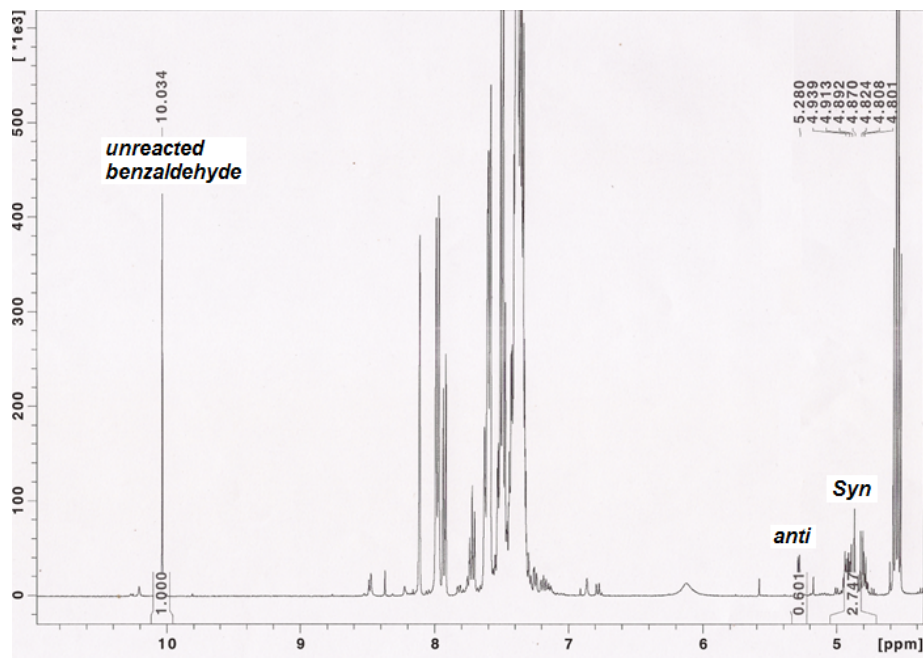

Figure S2. Example of integration in the <sup>1</sup>H-NMR spectrum for the determination of Henry reaction products (Table 1, Entry 5).

### Crystal structure analysis of pro-ligands

The molecular structures of compounds H<sub>2</sub>L1 and H<sub>2</sub>L2 are shown in Figures S3A and S3B. In both structures the hanging amide and carboxylic groups are almost in the same plane with the phenyl ring. In H<sub>2</sub>L1, not only the carboxylic groups are engaged in extensive strong COOH⋯O hydrogen bonding interactions with the surrounding DMF molecules ( $d_{D-A}$  2.560(3)Å;  $\angle D-H\cdots A$  169°.  $d_{D-A}$  2.584(4)Å;  $\angle D-H\cdots A$  173°), but also the amide oxygen atoms of the former participate in weak C-H⋯O contacts with the methyl hydrogen atoms of the latter thus forming a double chain 1D hydrogen-bonded network (Figure S4). Additionally, the amide NH- is intramolecularly hydrogen bonded with a carboxylate oxygen atom ( $d_{D-A}$  2.680(4)Å;  $\angle D-H\cdots A$  138°).

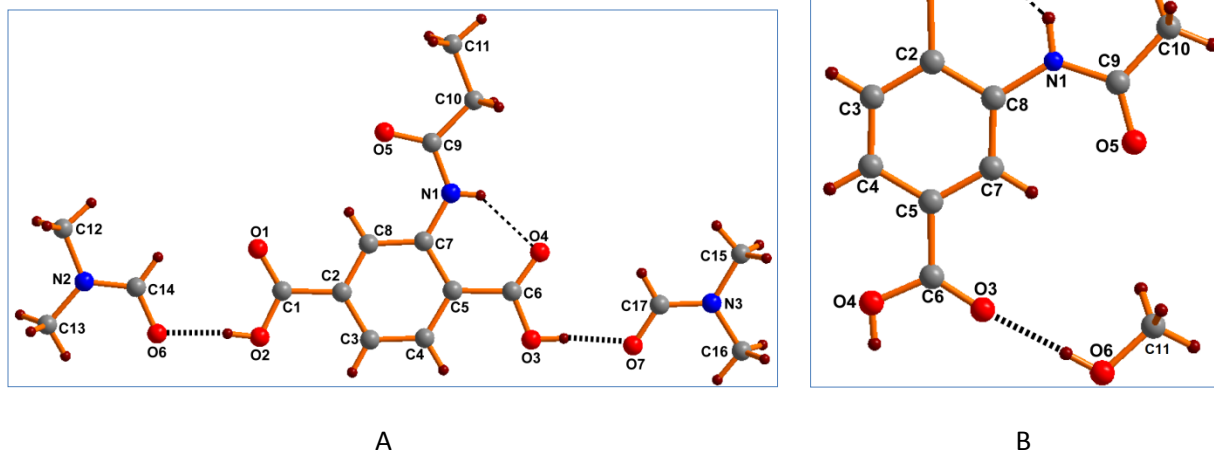

Figure S3: (A) Crystal structure of H<sub>2</sub>L1, hydrogen bonded with DMF molecules. (B) Crystal structure of H<sub>2</sub>L2, hydrogen bonded with methanol molecule.

In the case of H<sub>2</sub>L2, the methanol molecules simultaneously act as H-acceptor ( $d_{D-A}$ , 2.554(3)Å;  $\angle D-H\cdots A$  170°) and H-donor ( $d_{D-A}$ , 2.731(3)Å;  $\angle D-H\cdots A$  175°) to carboxylic groups of vicinal H<sub>2</sub>L2 molecules and together with the strong intermolecular NH–O interaction ( $d_{D-A}$  2.656(2)Å;  $\angle D-H\cdots A$  141°) they form a  $C_2^2(11)$  graph set. The intermolecular organization in this compound is directed by H<sub>2</sub>L2–H<sub>2</sub>L2 as well as H<sub>2</sub>L2–methanol O–H $\cdots$ O hydrogen bonds (Figure S5) thus representing a continuous two dimensional supramolecular assembly of the component species.

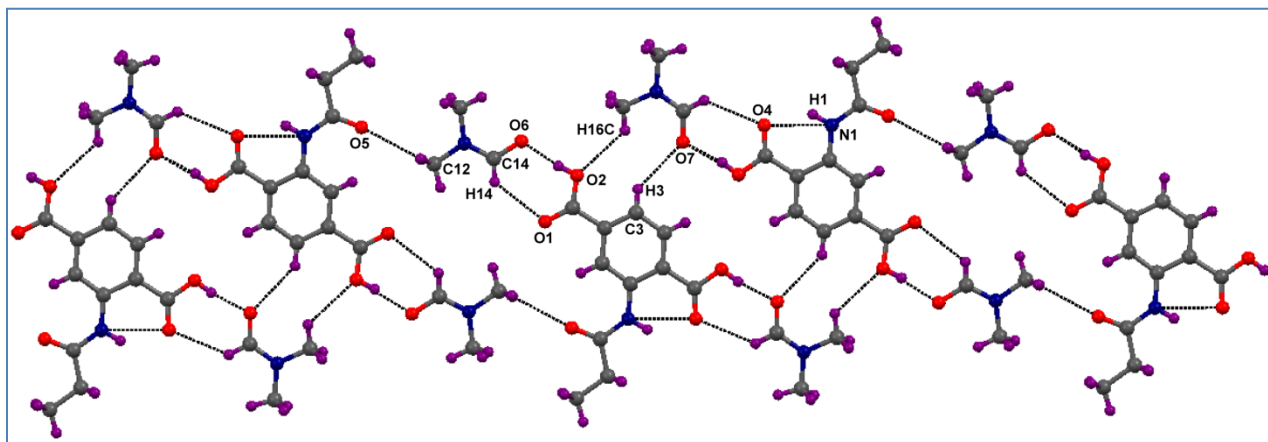

Figure S4: One dimensional hydrogen bonded network of H<sub>2</sub>L1 and DMF molecules

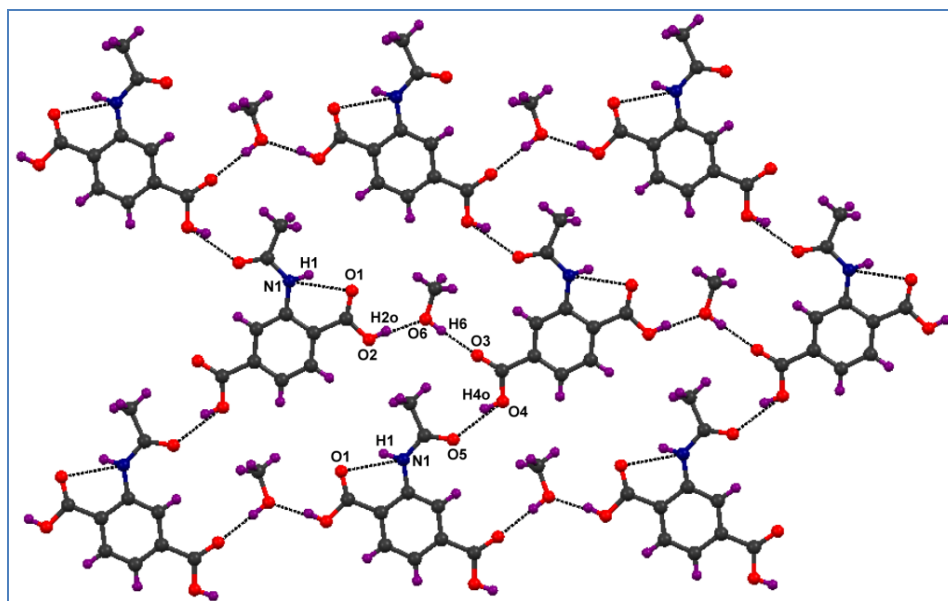

Figure S5: Two dimensional hydrogen bonded network of H<sub>2</sub>L<sub>2</sub> and methanol molecules
